# Supplementary material for: The Prognostic Significance of Tumor-Infiltrating Lymphocytes, PD-L1, BRCA Mutation Status and Tumor Mutational Burden in Early-Stage High-Grade Serous Ovarian Carcinoma—A Study by the Spanish Group for Ovarian Cancer Research (GEICO)
Source: MDPI journal article supplement (doi:10.3390/ijms241311183), 2023-07-06
Supplement: s1 [file s1]

| <b>Surgical staging procedures performed and adjuvant treatment</b> |            |            |                |
|---------------------------------------------------------------------|------------|------------|----------------|
|                                                                     | <b>YES</b> | <b>NO</b>  | <b>UNKNOWN</b> |
| Omentectomy                                                         | 101(80,8%) | 18(14,4%)  | 6(4,8%)        |
| Biopsy or resection of any adhesions close to the tumor             | 78(62,4%)  | 24(19,2%)  | 23(18,4%)      |
| Blind biopsy of the bladder peritoneum and pouch of Douglas         | 53(42,4%)  | 54(43,2%)  | 18(14,4%)      |
| Blind biopsy of the left parietocolic space                         | 47(37,6%)  | 54(43,2%)  | 24(19,2%)      |
| Blind biopsy or brush biopsy of the right diaphragmatic dome        | 37(29,6%)  | 65(52%)    | 23(18,4%)      |
| Blind biopsy of the wall of the pelvic peritoneum and the local     | 45(36%)    | 56(44,8%)  | 24(19,2%)      |
| Aortic lymphadenectomy                                              | 6(4,8%)    | 4(3,2%)    | 115(92%)       |
| Was relaparotomy performed?                                         | 11(8,8%)   | 113(90,4%) | 1(0,8%)        |
| Presence of ascites                                                 | 1(0,8%)    | 10(8%)     | 114(91,2%)     |
| Gross residual tumor                                                | 9(7,2%)    | 101(80,8%) | 15(12%)        |
| Incidental finding in prophylactic salpingo-oophorectomy            | 0          | 9(7,2%)    | 116(92,8%)     |
| Broken capsule before surgery                                       | 0          | 0          | 125            |
| Adjuvant treatment                                                  | 115(92%)   | 7(5,6%)    | 3(2,4%)        |
| <b>Number of chemotherapy cycles</b>                                |            |            | <b>N</b>       |
| 1                                                                   |            |            | 1(0,8%)        |
| 2                                                                   |            |            | 1(0,8%)        |
| 3                                                                   |            |            | 3(2,4%)        |
| 4                                                                   |            |            | 28(22,4%)      |
| 5                                                                   |            |            | 1(0,8%)        |
| 6                                                                   |            |            | 62(49,6%)      |
| 8                                                                   |            |            | 1(0,8%)        |
| Unknown                                                             |            |            | 28(22,4%)      |
| <b>Type of chemotherapy</b>                                         |            |            | <b>N</b>       |
| Carboplatin + paclitaxel                                            |            |            | 106(84,8%)     |
| Carboplatin monotherapy                                             |            |            | 6(4,8%)        |
| Clinical trial Carboplatin + Paclitaxel +/-BIBF 1120                |            |            | 1(0,8%)        |
| Carboplatin + Cyclophosphamide                                      |            |            | 1(0,8%)        |
| Clinical trial Carboplatin + weekly taxol + Bevacizumab             |            |            | 1(0,8%)        |
| Unknown                                                             |            |            | 10(8%)         |
