# Supplementary figures and images for: The Prognostic Significance of Tumor-Infiltrating Lymphocytes, PD-L1, BRCA Mutation Status and Tumor Mutational Burden in Early-Stage High-Grade Serous Ovarian Carcinoma—A Study by the Spanish Group for Ovarian Cancer Research (GEICO)
Source: MDPI journal article supplement (doi:10.3390/ijms241311183), 2023-07-06

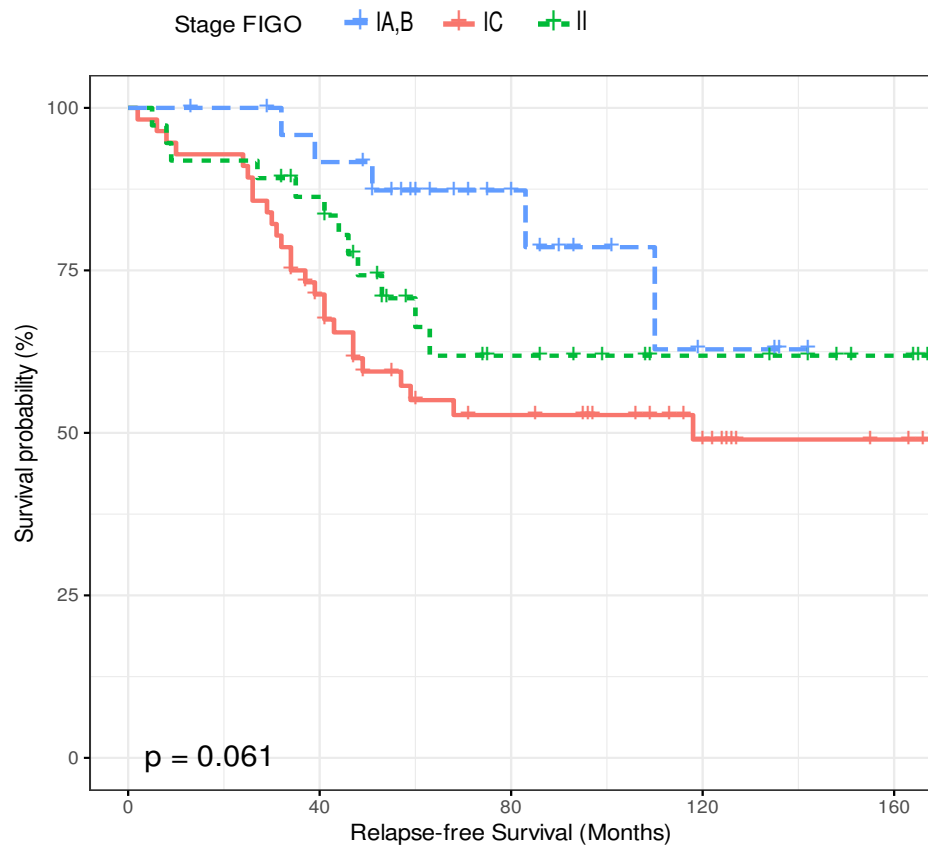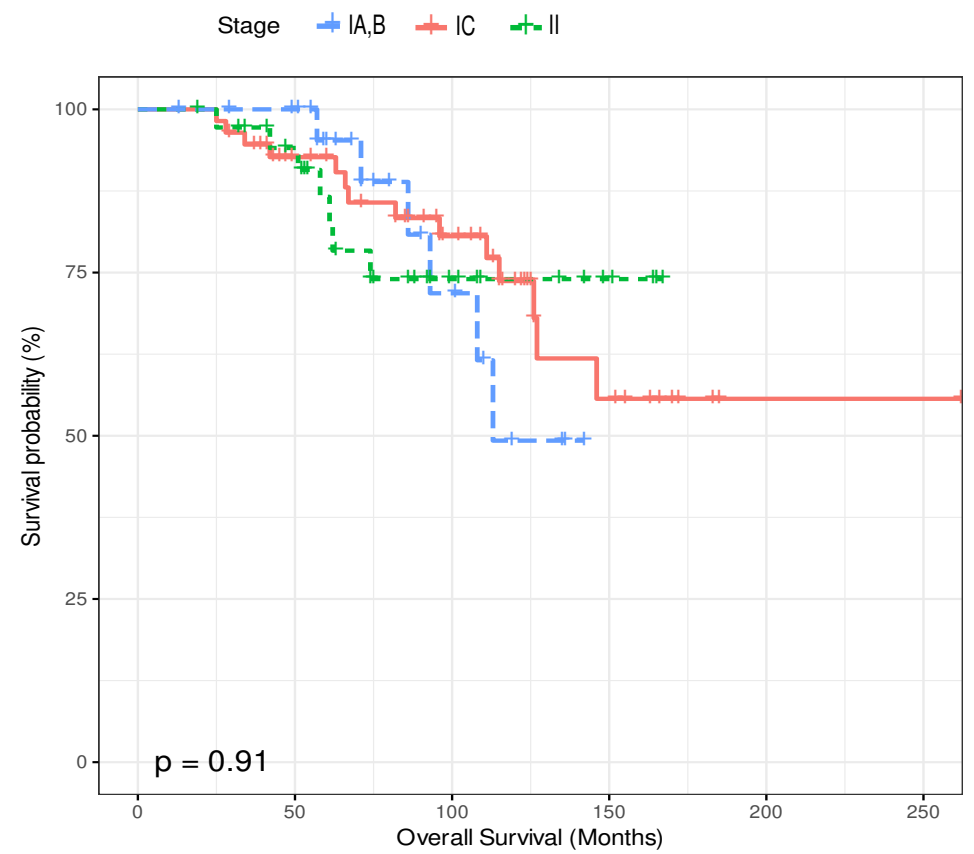

Supplement: s1 [file s1]

TMB Level    HIGH    LOW

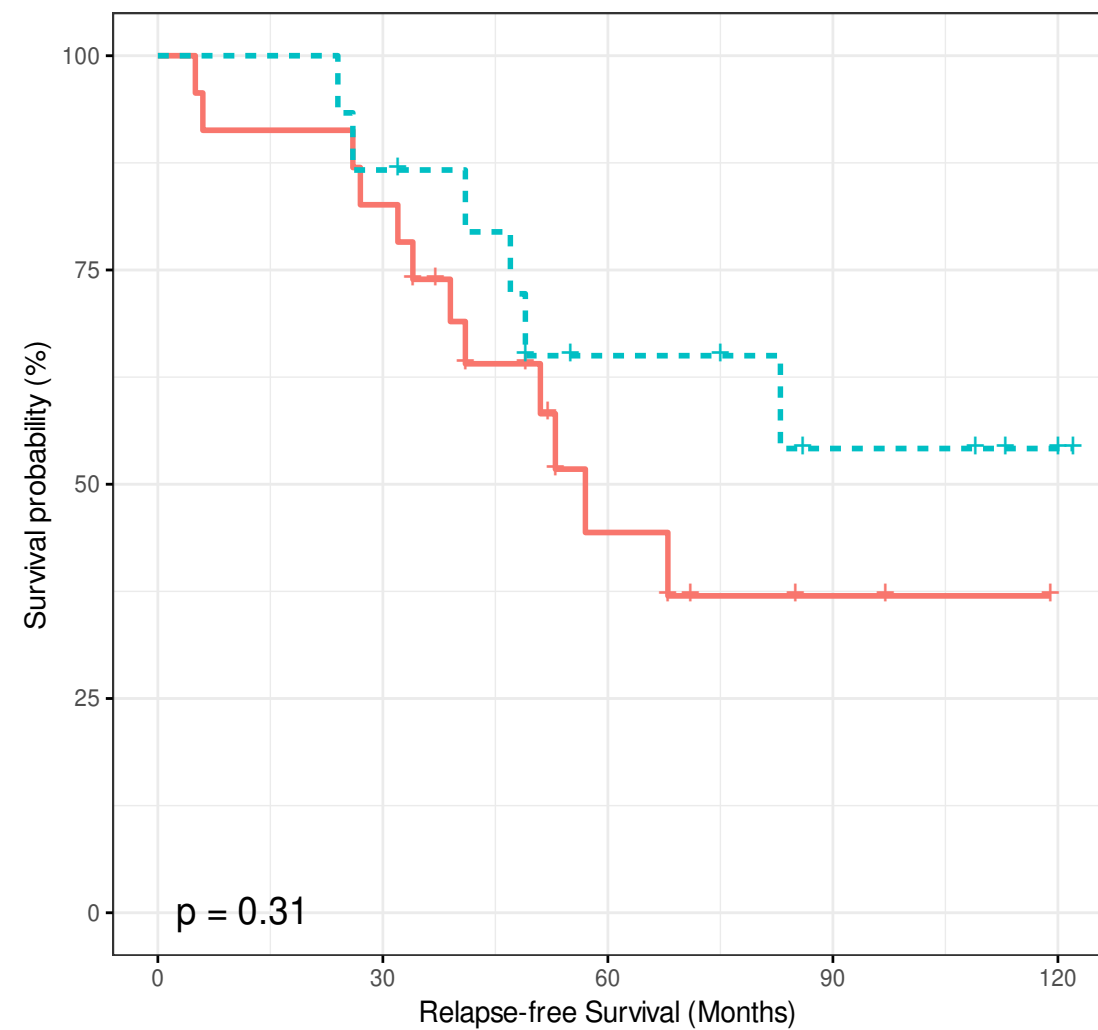

TMB Level    HIGH    LOW

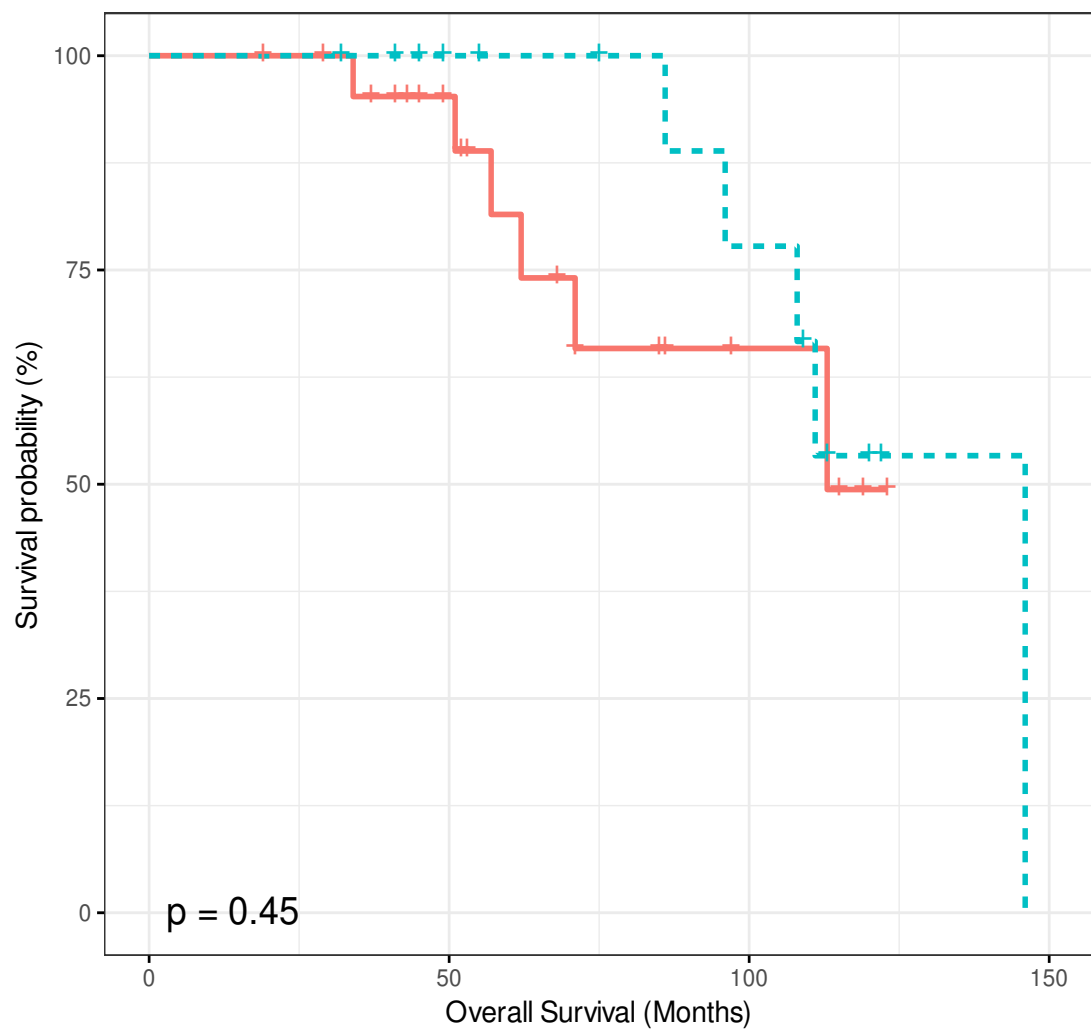

Supplement: s1 [file s1]

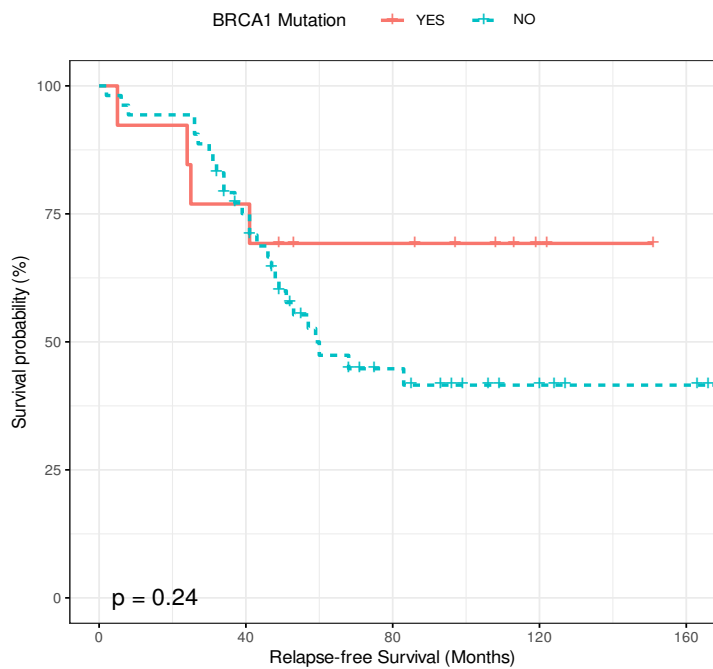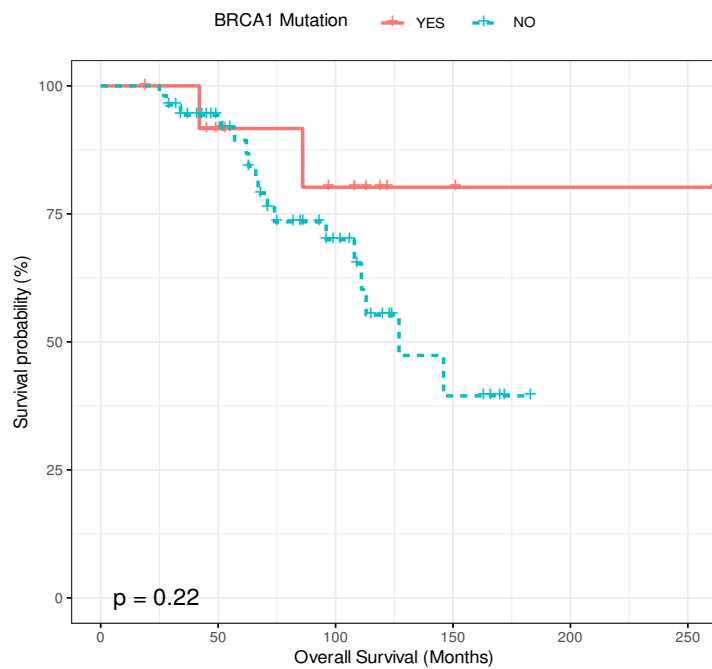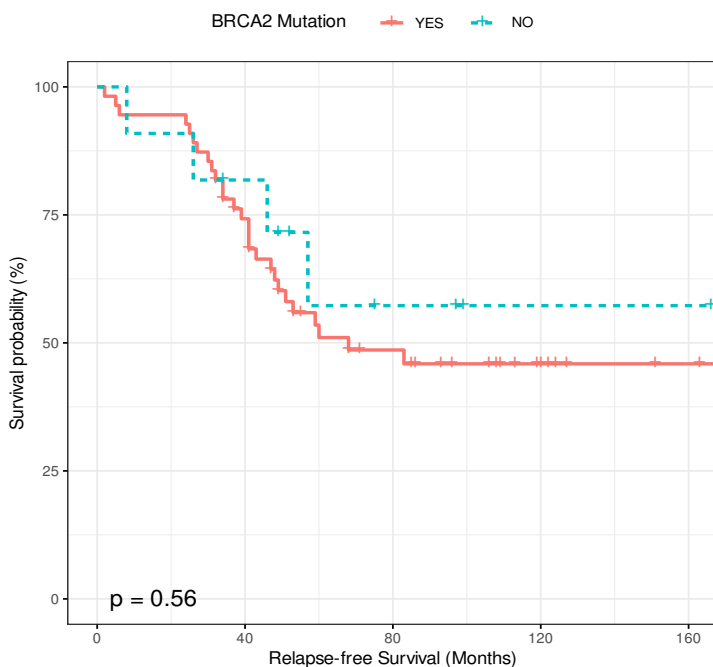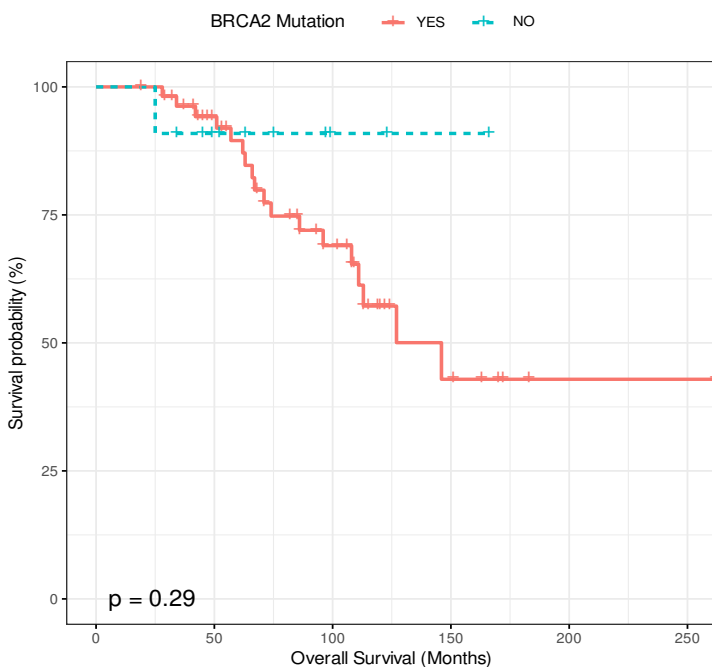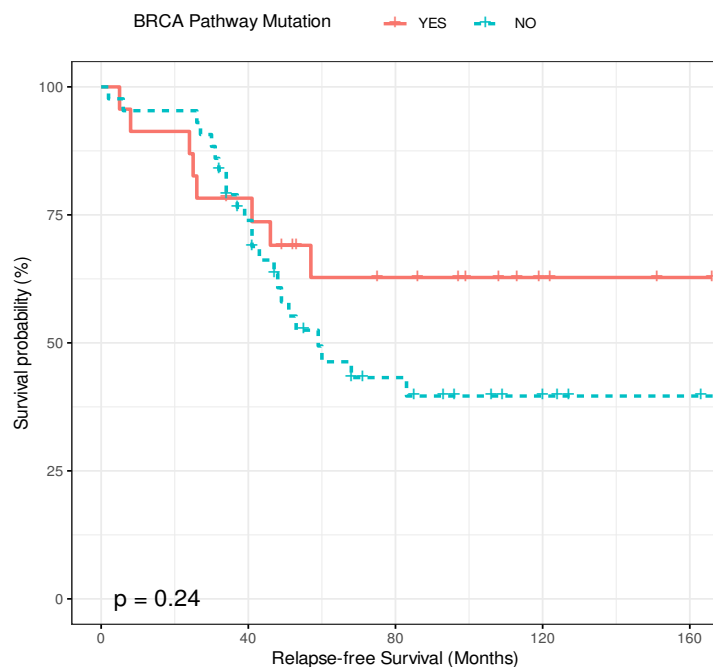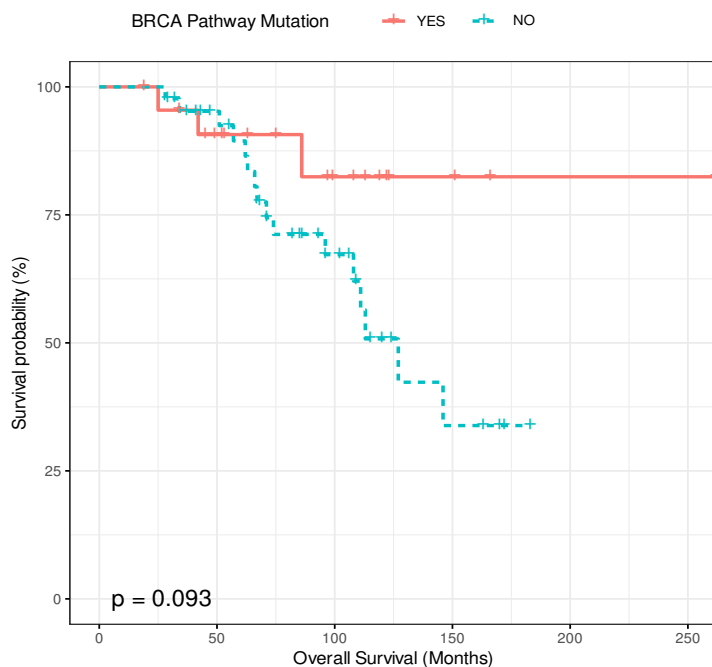

Supplement: s1 [file s1]

PD-L1 Expression    NO    YES

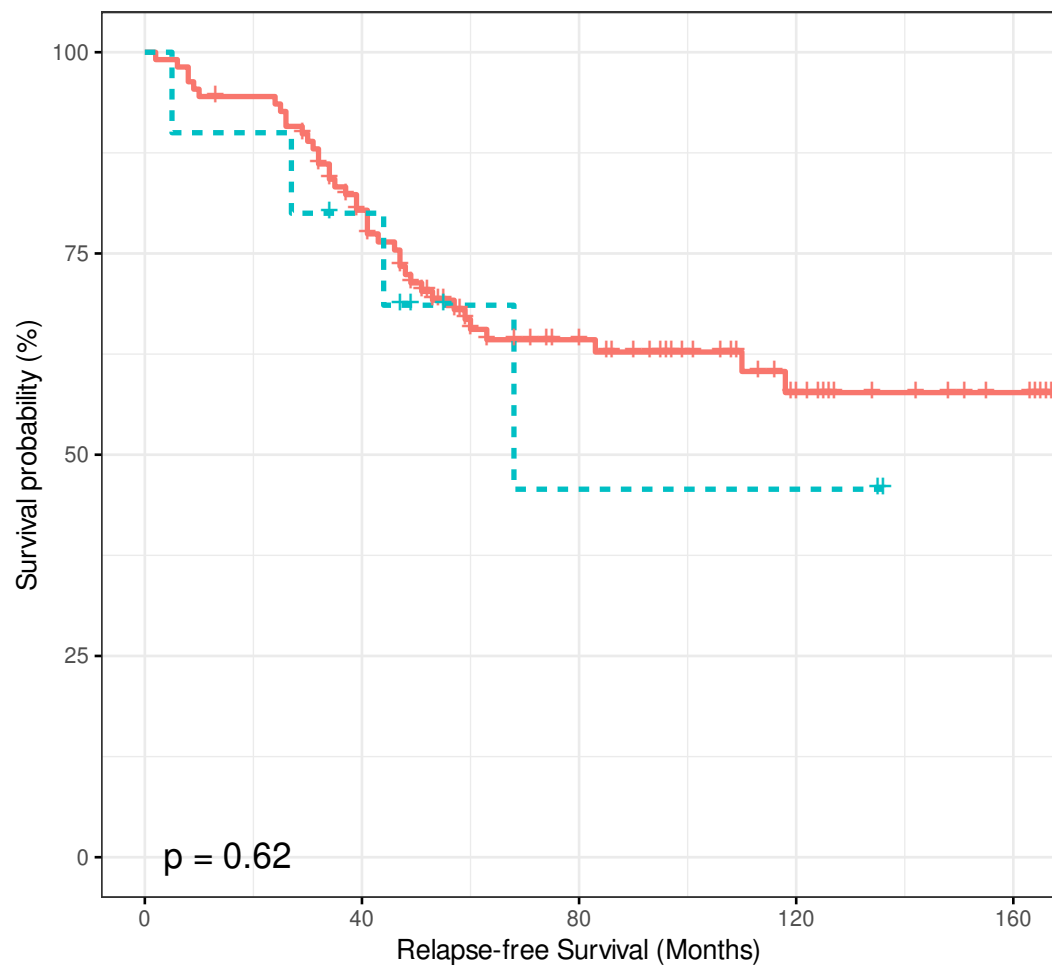

PD-L1 Expression    NO    YES

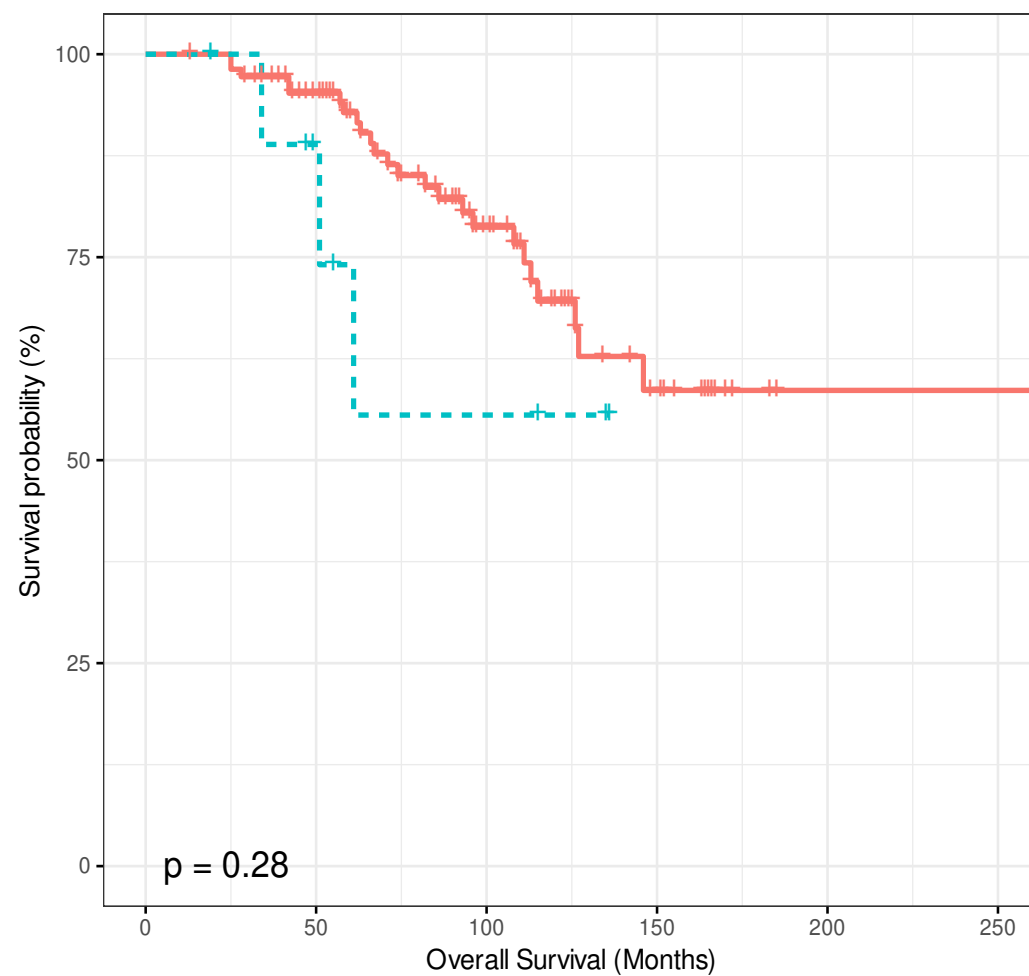

Supplement: s1 [file s1]
